# Supplementary material for: Cbl-Associated Protein CAP contributes to correct formation and robust function of the Drosophila heart tube
Source: PubMed Central journal article supplement (PMC7259718; doi:10.1371/journal.pone.0233719), 2020-05-29

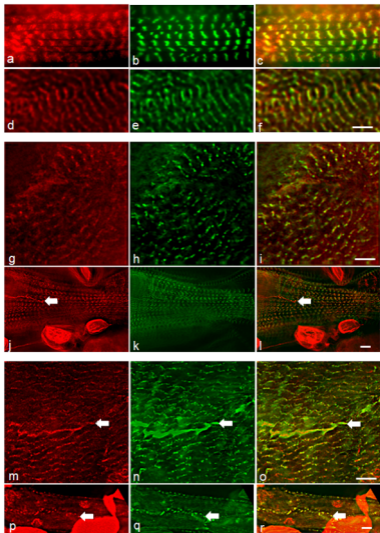

Supplement: pone.0233719.s002.pdf [file pone.0233719.s002.pdf]
