# Supplementary material for: Cbl-Associated Protein CAP contributes to correct formation and robust function of the Drosophila heart tube
Source: PubMed Central journal article supplement (PMC7259718; doi:10.1371/journal.pone.0233719), 2020-05-29
Supplement: pone.0233719.s007.pdf [file pone.0233719.s007.pdf]

### 1. Evaluation of cardioblast numbers in DVs of different genotype

|                                   | w1118  |       | CAP42b     |            | CAP49e     |             | CAP42b/Df(2R)BSC281 |            | CAP49e/Df(2R)BSC281 |            |            |
|-----------------------------------|--------|-------|------------|------------|------------|-------------|---------------------|------------|---------------------|------------|------------|
|                                   | Mef+   | Doc+  | Mef+       | Doc+       | Mef+       | Doc+        | Mef+                | Doc+       | Mef+                | Doc+       |            |
|                                   | 104    | 28    | 106        | 106        | 28         | 105         | 28                  | 106        | 28                  | 106        | 32         |
|                                   | 104    | 28    | 109        | 109        | 28         | 104         | 29                  | 106        | 28                  | 112        | 28         |
|                                   | 104    | 28    | 106        | 106        | 28         | 106         | 28                  | 104        | 28                  | 104        | 28         |
|                                   | 104    | 28    | 112        | 112        | 29         | 102         | 29                  | 109        | 31                  | 108        | 28         |
|                                   | 104    | 28    | 106        | 106        | 30         | 104         | 28                  | 106        | 28                  | 104        | 29         |
|                                   | 103    | 28    | 109        | 109        | 32         | 110         | 29                  | 108        | 28                  | 104        | 30         |
|                                   | 104    | 28    | 106        | 106        | 29         | 106         | 30                  | 104        | 28                  | 104        | 28         |
|                                   | 104    | 28    | 106        | 106        | 28         | 112         | 29                  | 104        | 27                  | 104        | 28         |
|                                   | 103    | 28    | 108        | 108        | 28         | 106         | 28                  | 108        | 28                  |            |            |
|                                   | 104    | 28    | 112        | 112        | 29         | 104         | 28                  | 108        | 30                  |            |            |
|                                   | 104    | 28    | 104        | 104        | 28         | 107         | 28                  |            |                     |            |            |
|                                   | 104    | 28    | 110        | 110        | 29         | 108         | 28                  |            |                     |            |            |
|                                   | 104    | 28    | 112        | 112        | 29         | 104         | 28                  |            |                     |            |            |
|                                   | 104    | 28    | 108        | 108        | 28         | 108         | 28                  |            |                     |            |            |
|                                   | 104    | 28    | 106        | 106        | 28         | 107         | 29                  |            |                     |            |            |
|                                   | 102    | 29    | 106        | 106        | 28         | 108         | 28                  |            |                     |            |            |
|                                   | 100    | 30    | 104        | 104        | 28         | 114         | 28                  |            |                     |            |            |
|                                   | 100    | 30    | 108        | 108        | 28         | 106         | 29                  |            |                     |            |            |
|                                   | 104    | 27    | 108        | 108        | 28         | 104         | 28                  |            |                     |            |            |
|                                   | 104    | 28    | 108        | 108        | 29         | 107         | 29                  |            |                     |            |            |
|                                   | 104    | 28    | 104        | 104        | 28         | 107         | 29                  |            |                     |            |            |
|                                   | 104    | 28    | 106        | 106        | 28         | 109         | 32                  |            |                     |            |            |
|                                   |        |       | 110        | 110        | 28         | 106         | 29                  |            |                     |            |            |
|                                   |        |       | 106        | 106        | 28         | 104         | 28                  |            |                     |            |            |
|                                   |        |       | 104        | 104        | 28         | 106         | 28                  |            |                     |            |            |
|                                   |        |       | 110        | 110        | 28         | 105         | 29                  |            |                     |            |            |
|                                   |        |       | 108        | 108        | 28         | 104         | 28                  |            |                     |            |            |
|                                   |        |       |            |            |            | 104         | 28                  |            |                     |            |            |
|                                   |        |       |            |            |            | 104         | 28                  |            |                     |            |            |
| Average                           | 103.45 | 28.18 | 107.48     | 107.48     | 28.44      | 106.24      | 28.55               | 106.30     | 28.40               | 105.75     | 28.88      |
| Standard deviation                | 1.22   | 0.66  | 2.44       | 2.44       | 0.89       | 2.63        | 0.87                | 1.89       | 1.17                | 2.92       | 1.46       |
| Variance                          | 1.50   | 0.44  | 6.07       | 6.07       | 0.93       | 7.92        | 0.91                | 3.57       | 1.38                | 8.50       | 2.13       |
| t-Test (2,2) (to w1118)           | 1      | 1     | 7.0036E-09 | 7.0036E-09 | 0.25773047 | 2.98074E-05 | 0.10334231          | 1.6323E-05 | 0.50605643          | 0.00454911 | 0.08137021 |
| t-Test (2,2) (to CAP42b)          |        |       |            |            |            |             |                     | 0.17592471 | 0.90240195          |            |            |
| t-Test (2,2) (to CAP49e)          |        |       |            |            |            |             |                     |            |                     | 0.64991005 | 0.43045122 |
| t-Test (2,2) (to CAPRNAi control) |        |       |            |            |            |             |                     |            |                     |            |            |

| Rhea1/CAP  |            | Scb/CAP    |            | tinD;tinc/CAPRNAi |            | twist;how x CAPRNAi |            | CAPRNAi control |            | CAP49e rescue by CAP-PC |            |            |                                   |
|------------|------------|------------|------------|-------------------|------------|---------------------|------------|-----------------|------------|-------------------------|------------|------------|-----------------------------------|
| Mef+       | Doc+       | Mef+       | Doc+       | Mef+              | Doc+       | Mef+                | Doc+       | Mef+            | Doc+       | Mef+                    | Doc+       |            |                                   |
| 104        | 28         | 104        | 104        | 28                | 104        | 28                  | 104        | 28              | 104        | 28                      | 104        | 29         |                                   |
| 108        | 29         | 104        | 104        | 28                | 104        | 28                  | 104        | 28              | 104        | 29                      | 104        | 29         |                                   |
| 108        | 28         | 104        | 104        | 28                | 104        | 28                  | 104        | 28              | 104        | 28                      | 104        | 29         |                                   |
| 106        | 28         | 104        | 104        | 28                | 102        | 28                  | 106        | 28              | 104        | 28                      | 104        | 27         |                                   |
| 104        | 28         | 104        | 104        | 29                | 104        | 28                  | 106        | 28              | 104        | 28                      | 104        | 28         |                                   |
| 104        | 28         | 104        | 104        | 28                | 104        | 28                  | 104        | 29              | 104        | 28                      | 104        | 28         |                                   |
|            |            | 106        | 106        | 28                | 102        | 27                  | 103        | 30              | 104        | 28                      | 104        | 28         |                                   |
|            |            | 102        | 102        | 28                | 104        | 28                  | 104        | 29              | 105        | 29                      | 106        | 28         |                                   |
|            |            | 104        | 104        | 28                | 105        | 28                  | 104        | 28              |            |                         |            |            |                                   |
|            |            | 104        | 104        | 28                | 104        | 28                  | 104        | 29              |            |                         |            |            |                                   |
|            |            | 106        | 106        | 28                | 104        | 28                  | 104        | 29              |            |                         |            |            |                                   |
|            |            |            |            | 104               | 104        | 28                  | 104        | 29              |            |                         |            |            |                                   |
|            |            |            |            |                   | 104        | 28                  | 104        | 29              |            |                         |            |            |                                   |
|            |            |            |            |                   |            | 102                 | 102        | 29              |            |                         |            |            |                                   |
|            |            |            |            |                   |            |                     |            |                 |            |                         |            |            |                                   |
|            |            |            |            |                   |            |                     |            |                 |            |                         |            |            |                                   |
|            |            |            |            |                   |            |                     |            |                 |            |                         |            |            |                                   |
|            |            |            |            |                   |            |                     |            |                 |            |                         |            |            |                                   |
|            |            |            |            |                   |            |                     |            |                 |            |                         |            |            |                                   |
|            |            |            |            |                   |            |                     |            |                 |            |                         |            |            |                                   |
|            |            |            |            |                   |            |                     |            |                 |            |                         |            |            |                                   |
|            |            |            |            |                   |            |                     |            |                 |            |                         |            |            |                                   |
|            |            |            |            |                   |            |                     |            |                 |            |                         |            |            |                                   |
|            |            |            |            |                   |            |                     |            |                 |            |                         |            |            |                                   |
|            |            |            |            |                   |            |                     |            |                 |            |                         |            |            |                                   |
|            |            |            |            |                   |            |                     |            |                 |            |                         |            |            |                                   |
|            |            |            |            |                   |            |                     |            |                 |            |                         |            |            |                                   |
|            |            |            |            |                   |            |                     |            |                 |            |                         |            |            |                                   |
|            |            |            |            |                   |            |                     |            |                 |            |                         |            |            |                                   |
| 105.67     | 28.17      | 104.18     | 104.18     | 28.09             | 103.75     | 27.92               | 104.07     | 28.64           | 104.13     | 28.25                   | 104.25     | 28.25      | Average                           |
| 1.97       | 0.41       | 1.08       | 1.08       | 0.30              | 0.87       | 0.29                | 1.00       | 0.63            | 0.35       | 0.46                    | 0.71       | 0.71       | Standard deviation                |
| 3.87       | 0.17       | 1.16       | 1.16       | 0.09              | 0.75       | 0.08                | 0.99       | 0.40            | 0.13       | 0.21                    | 0.50       | 0.50       | Variance                          |
| 0.00199213 | 0.95832115 | 0.10489635 | 0.10489635 | 0.6704851         | 0.46522861 | 0.1997381           | 0.1235329  | 0.04652432      | 0.14192258 | 0.79200184              | 0.09566055 | 0.80861672 | t-Test (2,2) (to w1118)           |
|            |            |            |            |                   |            |                     |            |                 |            |                         |            |            | t-Test (2,2) (to CAP42b)          |
|            |            |            |            |                   |            |                     |            |                 |            |                         |            |            | t-Test (2,2) (to CAP49e)          |
|            |            |            |            |                   |            |                     |            |                 |            |                         |            |            | t-Test (2,2) (to CAPRNAi control) |
|            |            |            |            | 0.26362905        | 0.06163422 | 0.88577588          | 0.14171879 |                 |            |                         |            |            |                                   |

## 2. Evaluation of heart contraction cycle by life imaging

### 2.1. Maxima and minima of 10 cycles ( $HandGFP;w^{1118}$ )

| Label                             | Length | Label                              | Length | Label                              | Length |
|-----------------------------------|--------|------------------------------------|--------|------------------------------------|--------|
| max HandGFPKO10x01_R3D.avi: 2.57s | 144,84 | max HandGFPKO10x02_R3D.avi: 15.14s | 98,42  | max HandGFPKO10x03_R3D.avi: 13.71s | 96,25  |
| HandGFPKO10x01_R3D.avi: 4.57s     | 135,77 | HandGFPKO10x02_R3D.avi: 15.71s     | 88,81  | HandGFPKO10x03_R3D.avi: 14.29s     | 108,63 |
| HandGFPKO10x01_R3D.avi: 6.00s     | 136,68 | HandGFPKO10x02_R3D.avi: 16.43s     | 87,48  | HandGFPKO10x03_R3D.avi: 15.71s     | 95,27  |
| HandGFPKO10x01_R3D.avi: 7.29s     | 121,26 | HandGFPKO10x02_R3D.avi: 16.86s     | 92,18  | HandGFPKO10x03_R3D.avi: 16.43s     | 97,08  |
| HandGFPKO10x01_R3D.avi: 8.57s     | 132,62 | HandGFPKO10x02_R3D.avi: 17.43s     | 94,54  | HandGFPKO10x03_R3D.avi: 16.86      | 81,44  |
| HandGFPKO10x01_R3D.avi: 20.43s    | 124,79 | HandGFPKO10x02_R3D.avi: 18.00s     | 137,62 | HandGFPKO10x03_R3D.avi: 17.29s     | 97,14  |
| HandGFPKO10x01_R3D.avi: 31.00s    | 130,97 | HandGFPKO10x02_R3D.avi: 18.57s     | 121,26 | HandGFPKO10x03_R3D.avi: 17.57s     | 95,85  |
| HandGFPKO10x01_R3D.avi: 32.29s    | 121,31 | HandGFPKO10x02_R3D.avi: 19.29      | 124,06 | HandGFPKO10x03_R3D.avi: 21.57s     | 97,99  |
| HandGFPKO10x01_R3D.avi: 33.29s    | 110,72 | HandGFPKO10x02_R3D.avi: 21.00s     | 89,02  | HandGFPKO10x03_R3D.avi: 22.71s     | 80,62  |
| HandGFPKO10x01_R3D.avi: 35.29s    | 136,86 | HandGFPKO10x02_R3D.avi: 22.14s     | 94,02  | HandGFPKO10x03_R3D.avi: 23.00s     | 85,09  |
| Average                           | 129,58 |                                    | 102,74 |                                    | 93,14  |
| Standard deviation                | 9,50   |                                    | 17,04  |                                    | 8,56   |
| Max                               | 144,84 |                                    | 137,62 |                                    | 108,63 |
| Min                               | 110,72 |                                    |        |                                    |        |
| min HandGFPKO10x01_R3D.avi: 3.14s | 53,41  | min HandGFPKO10x02_R3D.avi: 15.57s | 49,24  | min HandGFPKO10x03_R3D.avi: 14.00s | 63,25  |
| HandGFPKO10x01_R3D.avi: 5.14s     | 61,29  | HandGFPKO10x02_R3D.avi: 16.14      | 48,17  | HandGFPKO10x03_R3D.avi: 14.86s     | 58,87  |
| HandGFPKO10x01_R3D.avi: 6.86s     | 58,26  | HandGFPKO10x02_R3D.avi: 16.71s     | 47,85  | HandGFPKO10x03_R3D.avi: 15.86      | 53,49  |
| HandGFPKO10x01_R3D.avi: 7.57s     | 78,26  | HandGFPKO10x02_R3D.avi: 17.14s     | 42,95  | HandGFPKO10x03_R3D.avi: 16.57s     | 50,61  |
| HandGFPKO10x01_R3D.avi: 9.00s     | 60,44  | HandGFPKO10x02_R3D.avi: 17.71s     | 59,08  | HandGFPKO10x03_R3D.avi: 17.00s     | 67,05  |
| HandGFPKO10x01_R3D.avi: 20.00s    | 60,61  | HandGFPKO10x02_R3D.avi: 18.29      | 85,62  | HandGFPKO10x03_R3D.avi: 17.43s     | 48,76  |
| HandGFPKO10x01_R3D.avi: 30.43s    | 60,11  | HandGFPKO10x02_R3D.avi: 18.86s     | 74,81  | HandGFPKO10x03_R3D.avi: 17.86s     | 50,33  |
| HandGFPKO10x01_R3D.avi: 31.57s    | 54,71  | HandGFPKO10x02_R3D.avi: 20.00s     | 35,01  | HandGFPKO10x03_R3D.avi: 21.43s     | 60,54  |
| HandGFPKO10x01_R3D.avi: 32.71s    | 58,52  | HandGFPKO10x02_R3D.avi: 21.00s     | 30,59  | HandGFPKO10x03_R3D.avi: 22.00s     | 58,82  |
| HandGFPKO10x01_R3D.avi: 33.71s    | 63,82  | HandGFPKO10x02_R3D.avi: 22.71      | 28,86  | HandGFPKO10x03_R3D.avi: 22.86s     | 54,59  |
| Mean                              | 58,88  |                                    | 50,22  |                                    | 56,63  |
| STABW.N                           | 3,23   |                                    | 17,53  |                                    | 5,74   |
| Max                               | 63,82  |                                    | 85,62  |                                    | 67,05  |
| Min                               | 53,41  |                                    | 28,86  |                                    | 48,76  |

### 2.2. Maxima and minima of consecutive cycles ( $CAP^{49e}$ )

| Evaluation Life Imaging CAP49e        |        |                                       |        |                                       |        |  |
|---------------------------------------|--------|---------------------------------------|--------|---------------------------------------|--------|--|
| Label                                 | Length | Label                                 | Length | Label                                 | Length |  |
| max CAP49eHandGFP10x02_R3D.avi: 0.71s | 127,25 | max CAP49eHandGFP10x03_R3D.avi: 5.86s | 190,69 | max CAP49eHandGFP10x04_R3D.avi: 5.00s | 128,55 |  |
| CAP49eHandGFP10x02_R3D.avi: 1.43s     | 125,06 | CAP49eHandGFP10x03_R3D.avi: 6.43s     | 192,72 | CAP49eHandGFP10x04_R3D.avi: 7.00s     | 109,88 |  |
| CAP49eHandGFP10x02_R3D.avi: 1.71s     | 129,14 | CAP49eHandGFP10x03_R3D.avi: 7.14s     | 192,35 | CAP49eHandGFP10x04_R3D.avi: 9.00s     | 44,00  |  |
| CAP49eHandGFP10x02_R3D.avi: 2.14s     | 109,00 | CAP49eHandGFP10x03_R3D.avi: 7.86s     | 177,41 | CAP49eHandGFP10x04_R3D.avi: 11.00s    | 46,32  |  |
| CAP49eHandGFP10x02_R3D.avi: 2.43s     | 118,21 | CAP49eHandGFP10x03_R3D.avi: 8.57s     | 190,42 | CAP49eHandGFP10x04_R3D.avi: 13.00s    | 75,47  |  |
| CAP49eHandGFP10x02_R3D.avi: 3.14s     | 113,00 | CAP49eHandGFP10x03_R3D.avi: 9.29s     | 183,44 | CAP49eHandGFP10x04_R3D.avi: 15.00s    | 133,65 |  |
| CAP49eHandGFP10x02_R3D.avi: 4.71      | 118,00 | CAP49eHandGFP10x03_R3D.avi: 11.57s    | 190,34 | CAP49eHandGFP10x04_R3D.avi: 17.00s    | 140,07 |  |
| CAP49eHandGFP10x02_R3D.avi: 5.43      | 118,02 | CAP49eHandGFP10x03_R3D.avi: 12.43s    | 172,53 | CAP49eHandGFP10x04_R3D.avi: 19.00s    | 141,11 |  |
| CAP49eHandGFP10x02_R3D.avi: 6.14s     | 109,29 | CAP49eHandGFP10x03_R3D.avi: 13.14s    | 182,24 | CAP49eHandGFP10x04_R3D.avi: 21.00s    | 65,76  |  |
| CAP49eHandGFP10x02_R3D.avi:           | 107,00 | CAP49eHandGFP10x03_R3D.avi: 14.00s    | 175,91 | CAP49eHandGFP10x04_R3D.avi: 23.00s    | 44,27  |  |
| Average                               | 117,40 |                                       | 183,97 |                                       | 92,91  |  |
| Standard deviation                    | 7,88   |                                       | 7,04   |                                       | 39,67  |  |
| MAX                                   | 129,14 |                                       | 192,72 |                                       | 141,11 |  |
| MIN                                   | 107,00 |                                       | 172,53 |                                       | 44,00  |  |
| min CAP49eHandGFP10x02_R3D.avi: 1.14s | 96,02  | min CAP49eHandGFP10x03_R3D.avi: 5.43s | 133,81 | min CAP49eHandGFP10x04_R3D.avi: 6.00s | 136,78 |  |
| CAP49eHandGFP10x02_R3D.avi: 1.57s     | 118,07 | CAP49eHandGFP10x03_R3D.avi: 6.14s     | 133,24 | CAP49eHandGFP10x04_R3D.avi: 8.00s     | 45,04  |  |
| CAP49eHandGFP10x02_R3D.avi: 1.86s     | 101,27 | CAP49eHandGFP10x03_R3D.avi: 6.86s     | 131,94 | CAP49eHandGFP10x04_R3D.avi: 10.00s    | 41,11  |  |
| CAP49eHandGFP10x02_R3D.avi: 2.29s     | 94,89  | CAP49eHandGFP10x03_R3D.avi: 7.57s     | 127,09 | CAP49eHandGFP10x04_R3D.avi: 12.00s    | 45,61  |  |
| CAP49eHandGFP10x02_R3D.avi: 2.71s     | 93,02  | CAP49eHandGFP10x03_R3D.avi: 8.29s     | 125,42 | CAP49eHandGFP10x04_R3D.avi: 14.00s    | 116,39 |  |
| CAP49eHandGFP10x02_R3D.avi: 3.57s     | 105,30 | CAP49eHandGFP10x03_R3D.avi: 9.00s     | 136,56 | CAP49eHandGFP10x04_R3D.avi: 16.00s    | 141,45 |  |
| CAP49eHandGFP10x02_R3D.avi: 5.00s     | 95,89  | CAP49eHandGFP10x03_R3D.avi: 9.71s     | 123,69 | CAP49eHandGFP10x04_R3D.avi: 18.00s    | 137,00 |  |
| CAP49eHandGFP10x02_R3D.avi: 5.71      | 88,14  | CAP49eHandGFP10x03_R3D.avi: 11.86s    | 133,15 | CAP49eHandGFP10x04_R3D.avi: 20.00s    | 142,90 |  |
| CAP49eHandGFP10x02_R3D.avi: 6.43s     | 91,14  | CAP49eHandGFP10x03_R3D.avi: 12.71s    | 121,28 | CAP49eHandGFP10x04_R3D.avi: 22.00s    | 46,32  |  |
| CAP49eHandGFP10x02_R3D.avi:           | 88,01  | CAP49eHandGFP10x03_R3D.avi: 12.57s    | 120,60 | CAP49eHandGFP10x04_R3D.avi: 24.00s    | 44,94  |  |
| Average                               | 97,30  |                                       | 128,68 |                                       | 95,16  |  |
| Standard deviation                    | 9,10   |                                       | 5,46   |                                       | 45,01  |  |
| MAX                                   | 118,07 |                                       | 136,56 |                                       | 142,90 |  |
| MIN                                   | 88,01  |                                       | 120,60 |                                       | 44,94  |  |

| Label                                 | Length | Label                                 | Length |
|---------------------------------------|--------|---------------------------------------|--------|
| max CAP49eHandGFP10x05_R3D.avi: 5.00s | 95,08  | max CAP49eHandGFP10x07_R3D.avi: 0.57s | 136,67 |
| CAP49eHandGFP10x05_R3D.avi: 6.00s     | 96,15  | CAP49eHandGFP10x07_R3D.avi: 1.00s     | 127,58 |
| CAP49eHandGFP10x05_R3D.avi: 7.00s     | 101,07 | CAP49eHandGFP10x07_R3D.avi: 1.43s     | 110,22 |
| CAP49eHandGFP10x05_R3D.avi: 9.00s     | 98,41  | CAP49eHandGFP10x07_R3D.avi: 1.86s     | 132,38 |
| CAP49eHandGFP10x05_R3D.avi: 11.00s    | 96,57  | CAP49eHandGFP10x07_R3D.avi: 2.29s     | 137,30 |
| CAP49eHandGFP10x05_R3D.avi: 13.00s    | 99,93  | CAP49eHandGFP10x07_R3D.avi: 2.71s     | 131,80 |
| CAP49eHandGFP10x05_R3D.avi: 17.00s    | 90,87  | CAP49eHandGFP10x07_R3D.avi: 3.14s     | 133,96 |
| CAP49eHandGFP10x05_R3D.avi: 21.00s    | 96,61  | CAP49eHandGFP10x07_R3D.avi: 3.57s     | 136,13 |
| CAP49eHandGFP10x05_R3D.avi: 25.00s    | 97,95  | CAP49eHandGFP10x07_R3D.avi: 5.29s     | 98,86  |
| CAP49eHandGFP10x05_R3D.avi: 33.00s    | 93,91  | CAP49eHandGFP10x07_R3D.avi: 5.71s     | 92,78  |
|                                       | 96,66  |                                       | 123,77 |
|                                       | 2,81   |                                       | 15,89  |
|                                       | 101,07 |                                       | 137,30 |
|                                       | 90,87  |                                       | 92,78  |
| min CAP49eHandGFP10x05_R3D.avi: 5.57s | 94,81  | min CAP49eHandGFP10x07_R3D.avi: 0.71s | 83,07  |
| CAP49eHandGFP10x05_R3D.avi: 6.57s     | 102,42 | CAP49eHandGFP10x07_R3D.avi: 1.14s     | 63,13  |
| CAP49eHandGFP10x05_R3D.avi: 7.57s     | 98,30  | CAP49eHandGFP10x07_R3D.avi: 1.57s     | 68,68  |
| CAP49eHandGFP10x05_R3D.avi: 9.57s     | 89,07  | CAP49eHandGFP10x07_R3D.avi: 2.00s     | 72,56  |
| CAP49eHandGFP10x05_R3D.avi: 11.57s    | 98,68  | CAP49eHandGFP10x07_R3D.avi: 2.43s     | 73,55  |
| CAP49eHandGFP10x05_R3D.avi: 13.57s    | 95,63  | CAP49eHandGFP10x07_R3D.avi: 2.86s     | 72,33  |
| CAP49eHandGFP10x05_R3D.avi: 17.57s    | 99,28  | CAP49eHandGFP10x07_R3D.avi: 3.29s     | 83,95  |
| CAP49eHandGFP10x05_R3D.avi: 21.57s    | 93,47  | CAP49eHandGFP10x07_R3D.avi: 3.86s     | 71,59  |
| CAP49eHandGFP10x05_R3D.avi: 25.57s    | 97,13  | CAP49eHandGFP10x07_R3D.avi: 5.43s     | 70,21  |
| CAP49eHandGFP10x05_R3D.avi: 33.57s    | 94,81  | CAP49eHandGFP10x07_R3D.avi: 5.86s     | 69,03  |
|                                       | 96,36  |                                       | 72,81  |
|                                       | 3,49   |                                       | 6,03   |
|                                       | 102,42 |                                       | 83,95  |
|                                       | 89,07  |                                       | 63,13  |

|     |                                   |        |     |                                    |        |     |                                |        |
|-----|-----------------------------------|--------|-----|------------------------------------|--------|-----|--------------------------------|--------|
| max | CAP49eHandGFP10x08_R3D.avi: 0.86s | 115,52 | max | CAP49eHandGFP10x09_R3D.avi: 4.14s  | 148,27 | max | CAP49eHandGFP10x12.avi: 2.86s  | 133,99 |
|     | CAP49eHandGFP10x08_R3D.avi: 1.86s | 116,43 |     | CAP49eHandGFP10x09_R3D.avi: 4.43s  | 147,35 |     | CAP49eHandGFP10x12.avi: 3.86s  | 133,46 |
|     | CAP49eHandGFP10x08_R3D.avi: 2.86s | 117,52 |     | CAP49eHandGFP10x09_R3D.avi: 4.57s  | 144,92 |     | CAP49eHandGFP10x12.avi: 4.86s  | 131,76 |
|     | CAP49eHandGFP10x08_R3D.avi: 3.86s | 110,37 |     | CAP49eHandGFP10x09_R3D.avi: 4.86s  | 154,73 |     | CAP49eHandGFP10x12.avi: 5.86s  | 136,00 |
|     | CAP49eHandGFP10x08_R3D.avi: 4.57s | 116,84 |     | CAP49eHandGFP10x09_R3D.avi: 5.71s  | 160,18 |     | CAP49eHandGFP10x12.avi: 6.86s  | 141,66 |
|     | CAP49eHandGFP10x08_R3D.avi: 5.57s | 114,35 |     | CAP49eHandGFP10x09_R3D.avi: 6.00s  | 164,83 |     | CAP49eHandGFP10x12.avi: 8.86s  | 138,96 |
|     | CAP49eHandGFP10x08_R3D.avi: 6.29s | 104,14 |     | CAP49eHandGFP10x09_R3D.avi: 6,29s  | 161,47 |     | CAP49eHandGFP10x12.avi: 10.86s | 139,43 |
|     | CAP49eHandGFP10x08_R3D.avi: 7.29s | 114,16 |     | CAP49eHandGFP10x09_R3D.avi: 21.14s | 159,39 |     | CAP49eHandGFP10x12.avi: 14.86s | 137,20 |
|     | CAP49eHandGFP10x08_R3D.avi: 8.14s | 116,35 |     | CAP49eHandGFP10x09_R3D.avi: 21.43s | 165,34 |     | CAP49eHandGFP10x12.avi: 18.86s | 137,06 |
|     | CAP49eHandGFP10x08_R3D.avi: 9.14s | 109,46 |     | CAP49eHandGFP10x09_R3D.avi: 21.79  | 170,88 |     | CAP49eHandGFP10x12.avi: 22.86s | 134,63 |
|     | Average                           | 113,51 |     |                                    | 157,74 |     |                                | 136,42 |
|     | Standard deviation                | 4,04   |     |                                    | 8,21   |     |                                | 2,89   |
|     | MAX                               | 117,52 |     |                                    | 170,88 |     |                                | 141,66 |
|     | MIN                               | 104,14 |     |                                    | 144,92 |     |                                | 131,76 |
| min | CAP49eHandGFP10x08_R3D.avi: 1.43s | 78,00  | min | CAP49eHandGFP10x09_R3D.avi: 4.00s  | 136,31 | min | CAP49eHandGFP10x12.avi: 3.14s  | 134,63 |
|     | CAP49eHandGFP10x08_R3D.avi: 2.29s | 94,34  |     | CAP49eHandGFP10x09_R3D.avi: 4.29s  | 136,93 |     | CAP49eHandGFP10x12.avi: 4.14s  | 129,00 |
|     | CAP49eHandGFP10x08_R3D.avi: 3.43s | 80,78  |     | CAP49eHandGFP10x09_R3D.avi: 4.71s  | 143,56 |     | CAP49eHandGFP10x12.avi: 5.14s  | 135,48 |
|     | CAP49eHandGFP10x08_R3D.avi: 4.29s | 75,15  |     | CAP49eHandGFP10x09_R3D.avi: 5.00s  | 144,51 |     | CAP49eHandGFP10x12.avi: 6.14s  | 132,40 |
|     | CAP49eHandGFP10x08_R3D.avi: 5.00s | 80,05  |     | CAP49eHandGFP10x09_R3D.avi: 5.86s  | 142,37 |     | CAP49eHandGFP10x12.avi: 7.14s  | 137,38 |
|     | CAP49eHandGFP10x08_R3D.avi: 6.00s | 71,17  |     | CAP49eHandGFP10x09_R3D.avi: 6.14s  | 135,06 |     | CAP49eHandGFP10x12.avi: 9.14s  | 136,75 |
|     | CAP49eHandGFP10x08_R3D.avi: 6.71s | 79,12  |     | CAP49eHandGFP10x09_R3D.avi: 6.43s  | 151,29 |     | CAP49eHandGFP10x12.avi: 10.14s | 138,76 |
|     | CAP49eHandGFP10x08_R3D.avi: 7.71s | 69,86  |     | CAP49eHandGFP10x09_R3D.avi: 21.29s | 142,37 |     | CAP49eHandGFP10x12.avi: 15.14s | 137,91 |
|     | CAP49eHandGFP10x08_R3D.avi: 8.57s | 73,74  |     | CAP49eHandGFP10x09_R3D.avi: 21.57s | 139,78 |     | CAP49eHandGFP10x12.avi: 19.14s | 136,57 |
|     | CAP49eHandGFP10x08_R3D.avi: 9.57s | 74,73  |     | CAP49eHandGFP10x09_R3D.avi: 21.86  | 152,86 |     | CAP49eHandGFP10x12.avi: 23.14s | 137,38 |
|     | Average                           | 77,69  |     |                                    | 142,50 |     |                                | 135,63 |
|     | Standard deviation                | 6,55   |     |                                    | 5,67   |     |                                | 2,80   |
|     | MAX                               | 94,34  |     |                                    | 152,86 |     |                                | 138,76 |
|     | MIN                               | 69,86  |     |                                    | 135,06 |     |                                | 129,00 |

|     |                                |        |     |                               |       |
|-----|--------------------------------|--------|-----|-------------------------------|-------|
| max | CAP49eHandGFP10x13.avi: 8.14s  | 114,83 | max | CAP49eHandGFP10x15.avi: 0.14s | 66,85 |
|     | CAP49eHandGFP10x13.avi: 11.14s | 132,85 |     | CAP49eHandGFP10x15.avi: 1.29s | 78,26 |
|     | CAP49eHandGFP10x13.avi: 12.43s | 122,48 |     | CAP49eHandGFP10x15.avi: 2.00s | 70,72 |
|     | CAP49eHandGFP10x13.avi: 13.86s | 146,73 |     | CAP49eHandGFP10x15.avi: 2.71s | 72,92 |
|     | CAP49eHandGFP10x13.avi: 15.14s | 125,25 |     | CAP49eHandGFP10x15.avi: 3.14s | 74,09 |
|     | CAP49eHandGFP10x13.avi: 16.71s | 112,61 |     | CAP49eHandGFP10x15.avi: 4.29s | 68,68 |
|     | CAP49eHandGFP10x13.avi: 18.29s | 107,28 |     | CAP49eHandGFP10x15.avi: 5.00s | 64,56 |
|     | CAP49eHandGFP10x13.avi: 20.00s | 118,26 |     | CAP49eHandGFP10x15.avi: 5.43s | 68,41 |
|     | CAP49eHandGFP10x13.avi: 31.14s | 119,10 |     | CAP49eHandGFP10x15.avi: 6.14s | 72,11 |
|     | CAP49eHandGFP10x13.avi: 32.71s | 103,75 |     | CAP49eHandGFP10x15.avi: 6.86s | 65,92 |
|     |                                | 120,31 |     |                               | 70,25 |
|     |                                | 11,93  |     |                               | 3,98  |
|     |                                | 146,73 |     |                               | 78,26 |
|     |                                | 103,75 |     |                               | 64,56 |
| min | CAP49eHandGFP10x13.avi: 8.86s  | 50,25  | min | CAP49eHandGFP10x15.avi: 0.29s | 68,03 |
|     | CAP49eHandGFP10x13.avi: 11.86s | 66,48  |     | CAP49eHandGFP10x15.avi: 1.43s | 72,95 |
|     | CAP49eHandGFP10x13.avi: 13.14s | 49,40  |     | CAP49eHandGFP10x15.avi: 2.29s | 66,73 |
|     | CAP49eHandGFP10x13.avi: 14.57s | 51,00  |     | CAP49eHandGFP10x15.avi: 3.00s | 72,45 |
|     | CAP49eHandGFP10x13.avi: 15.57s | 66,85  |     | CAP49eHandGFP10x15.avi: 3.29s | 70,23 |
|     | CAP49eHandGFP10x13.avi: 17.43s | 52,80  |     | CAP49eHandGFP10x15.avi: 4.43s | 64,54 |
|     | CAP49eHandGFP10x13.avi: 18.86s | 72,95  |     | CAP49eHandGFP10x15.avi: 5.14s | 66,10 |
|     | CAP49eHandGFP10x13.avi: 20.86s | 50,01  |     | CAP49eHandGFP10x15.avi: 5.57s | 64,78 |
|     | CAP49eHandGFP10x13.avi: 32.14s | 41,59  |     | CAP49eHandGFP10x15.avi: 6.29s | 67,68 |
|     | CAP49eHandGFP10x13.avi: 33.14s | 47,85  |     | CAP49eHandGFP10x15.avi: 7.00s | 68,01 |
|     |                                | 54,92  |     |                               | 68,15 |
|     |                                | 9,62   |     |                               | 2,77  |
|     |                                | 72,95  |     |                               | 72,95 |
|     |                                | 41,59  |     |                               | 64,54 |

|     |                                    |        |     |                                |        |     |                                |       |
|-----|------------------------------------|--------|-----|--------------------------------|--------|-----|--------------------------------|-------|
| max | CAP49eHandGFP10x16_R3D.avi: 2.57s  | 114,76 | max | CAP49eHandGFP10x17.avi: 1.14s  | 98,41  | max | CAP49eHandGFP10x18.avi: 0.57s  | 49,09 |
|     | CAP49eHandGFP10x16_R3D.avi: 3.29s  | 118,23 |     | CAP49eHandGFP10x17.avi: 1.57s  | 97,08  |     | CAP49eHandGFP10x18.avi: 1.57s  | 52,04 |
|     | CAP49eHandGFP10x16_R3D.avi: 4.00s  | 119,44 |     | CAP49eHandGFP10x17.avi: 2.00s  | 99,39  |     | CAP49eHandGFP10x18.avi: 2.57s  | 50,64 |
|     | CAP49eHandGFP10x16_R3D.avi: 4.71s  | 119,33 |     | CAP49eHandGFP10x17.avi: 2.43s  | 97,05  |     | CAP49eHandGFP10x18.avi: 3.57s  | 52,17 |
|     | CAP49eHandGFP10x16_R3D.avi: 10.43s | 121,28 |     | CAP49eHandGFP10x17.avi: 10.43s | 104,22 |     | CAP49eHandGFP10x18.avi: 4.57s  | 54,23 |
|     | CAP49eHandGFP10x16_R3D.avi: 10.86s | 119,22 |     | CAP49eHandGFP10x17.avi: 10.86s | 110,02 |     | CAP49eHandGFP10x18.avi: 9.57s  | 52,77 |
|     | CAP49eHandGFP10x16_R3D.avi: 11.43s | 120,42 |     | CAP49eHandGFP10x17.avi: 11.29s | 106,45 |     | CAP49eHandGFP10x18.avi: 14.57s | 41,80 |
|     | CAP49eHandGFP10x16_R3D.avi: 11.86s | 119,08 |     | CAP49eHandGFP10x17.avi: 16.86s | 110,46 |     | CAP49eHandGFP10x18.avi: 19.57s | 75,39 |
|     | CAP49eHandGFP10x16_R3D.avi: 12.86s | 108,08 |     | CAP49eHandGFP10x17.avi: 18.14s | 94,92  |     | CAP49eHandGFP10x18.avi: 24.57s | 86,01 |
|     | CAP49eHandGFP10x16_R3D.avi: 13.14s | 110,16 |     | CAP49eHandGFP10x17.avi: 18.57s | 89,89  |     | CAP49eHandGFP10x18.avi: 29.57s | 55,44 |
|     | Average                            | 117,00 |     |                                | 100,79 |     |                                | 56,96 |
|     | Standard deviation                 | 4,28   |     |                                | 6,41   |     |                                | 12,61 |
|     | MAX                                | 121,28 |     |                                | 110,46 |     |                                | 86,01 |
|     | MIN                                | 108,08 |     |                                | 89,89  |     |                                | 41,80 |
| min | CAP49eHandGFP10x16_R3D.avi: 3.00s  | 94,43  | min | CAP49eHandGFP10x17.avi: 1.29s  | 52,01  | min | CAP49eHandGFP10x18.avi: 1.00s  | 44,41 |
|     | CAP49eHandGFP10x16_R3D.avi: 3.71s  | 85,91  |     | CAP49eHandGFP10x17.avi: 1.71s  | 53,67  |     | CAP49eHandGFP10x18.avi: 2.00s  | 54,08 |
|     | CAP49eHandGFP10x16_R3D.avi: 4.43s  | 85,42  |     | CAP49eHandGFP10x17.avi: 2.14s  | 49,41  |     | CAP49eHandGFP10x18.avi: 3.00s  | 49,04 |
|     | CAP49eHandGFP10x16_R3D.avi: 5.14s  | 89,89  |     | CAP49eHandGFP10x17.avi: 2.71s  | 57,78  |     | CAP49eHandGFP10x18.avi: 4.00s  | 62,65 |
|     | CAP49eHandGFP10x16_R3D.avi: 10.71s | 97,53  |     | CAP49eHandGFP10x17.avi: 10.71s | 48,84  |     | CAP49eHandGFP10x18.avi: 5.00s  | 44,18 |
|     | CAP49eHandGFP10x16_R3D.avi: 11.14s | 88,26  |     | CAP49eHandGFP10x17.avi: 11.14s | 50,33  |     | CAP49eHandGFP10x18.avi: 10.00s | 47,04 |
|     | CAP49eHandGFP10x16_R3D.avi: 11.71s | 103,81 |     | CAP49eHandGFP10x17.avi: 11.57s | 47,01  |     | CAP49eHandGFP10x18.avi: 15.00s | 47,04 |
|     | CAP49eHandGFP10x16_R3D.avi: 12.14s | 82,35  |     | CAP49eHandGFP10x17.avi: 17.14s | 50,61  |     | CAP49eHandGFP10x18.avi: 20.00s | 70,66 |
|     | CAP49eHandGFP10x16_R3D.avi: 13.00s | 90,38  |     | CAP49eHandGFP10x17.avi: 18.43s | 32,25  |     | CAP49eHandGFP10x18.avi: 25.00s | 85,38 |
|     | CAP49eHandGFP10x16_R3D.avi: 13.43s | 93,47  |     | CAP49eHandGFP10x17.avi: 18.86s | 47,80  |     | CAP49eHandGFP10x18.avi: 30.00s | 56,09 |
|     | Average                            | 91,15  |     |                                | 48,97  |     |                                | 56,06 |
|     | Standard deviation                 | 6,04   |     |                                | 6,31   |     |                                | 12,68 |
|     | MAX                                | 103,81 |     |                                | 57,78  |     |                                | 85,38 |
|     | MIN                                | 82,35  |     |                                | 32,25  |     |                                | 44,18 |

|     |                                   |        |     |                                    |       |
|-----|-----------------------------------|--------|-----|------------------------------------|-------|
| max | CAP49eHandGFP10x20_R3D.avi: 0.86s | 103,77 | max | CAP49eHandGFP10x21_R3D.avi: 36.71s | 51,54 |
|     | CAP49eHandGFP10x20_R3D.avi: 1.14s | 101,21 |     | CAP49eHandGFP10x21_R3D.avi: 37.14s | 53,66 |
|     | CAP49eHandGFP10x20_R3D.avi: 1.43s | 119,57 |     | CAP49eHandGFP10x21_R3D.avi: 37.86s | 45,44 |
|     | CAP49eHandGFP10x20_R3D.avi: 1.86s | 91,53  |     | CAP49eHandGFP10x21_R3D.avi: 40.14s | 42,46 |
|     | CAP49eHandGFP10x20_R3D.avi: 2.14s | 92,36  |     | CAP49eHandGFP10x21_R3D.avi: 41.57s | 43,42 |
|     | CAP49eHandGFP10x20_R3D.avi: 5.00s | 104,24 |     | CAP49eHandGFP10x21_R3D.avi: 42.71s | 44,60 |
|     | CAP49eHandGFP10x20_R3D.avi: 6.00s | 120,11 |     | CAP49eHandGFP10x21_R3D.avi: 43.86s | 43,32 |
|     | CAP49eHandGFP10x20_R3D.avi: 6.56s | 122,04 |     | CAP49eHandGFP10x21_R3D.avi: 44.86s | 47,54 |
|     | CAP49eHandGFP10x20_R3D.avi: 7.57s | 116,85 |     | CAP49eHandGFP10x21_R3D.avi: 46.14s | 42,06 |
|     | CAP49eHandGFP10x20_R3D.avi: 7.86s | 107,99 |     | CAP49eHandGFP10x21_R3D.avi: 47.00s | 46,97 |
|     |                                   | 107,97 |     |                                    | 46,10 |
|     |                                   | 10,72  |     |                                    | 3,70  |
|     |                                   | 122,04 |     |                                    | 53,66 |
|     |                                   | 91,53  |     |                                    | 42,06 |
| min | CAP49eHandGFP10x20_R3D.avi: 1.00s | 74,32  | min | CAP49eHandGFP10x21_R3D.avi: 36.29s | 35,15 |
|     | CAP49eHandGFP10x20_R3D.avi: 1.29s | 77,18  |     | CAP49eHandGFP10x21_R3D.avi: 37.00  | 39,21 |
|     | CAP49eHandGFP10x20_R3D.avi: 1.57s | 83,19  |     | CAP49eHandGFP10x21_R3D.avi: 37.57  | 39,53 |
|     | CAP49eHandGFP10x20_R3D.avi: 2.00s | 89,69  |     | CAP49eHandGFP10x21_R3D.avi: 39.14  | 35,51 |
|     | CAP49eHandGFP10x20_R3D.avi: 2.29s | 88,14  |     | CAP49eHandGFP10x21_R3D.avi:40.71s  | 36,98 |
|     | CAP49eHandGFP10x20_R3D.avi: 5.14s | 78,26  |     | CAP49eHandGFP10x21_R3D.avi: 42.00  | 39,43 |
|     | CAP49eHandGFP10x20_R3D.avi: 6.14s | 69,32  |     | CAP49eHandGFP10x21_R3D.avi: 43.29  | 38,02 |
|     | CAP49eHandGFP10x20_R3D.avi: 7.00s | 90,35  |     | CAP49eHandGFP10x21_R3D.avi: 44.43  | 35,61 |
|     | CAP49eHandGFP10x20_R3D.avi: 7.43s | 78,75  |     | CAP49eHandGFP10x21_R3D.avi: 45.29  | 37,39 |
|     | CAP49eHandGFP10x20_R3D.avi: 7.71s | 69,77  |     | CAP49eHandGFP10x21_R3D.avi: 46.43  | 34,04 |
|     |                                   | 79,90  |     |                                    | 37,09 |
|     |                                   | 7,35   |     |                                    | 1,86  |
|     |                                   | 90,35  |     |                                    | 39,53 |
|     |                                   | 69,32  |     |                                    | 34,04 |

### 2.3. Evaluation of heart contraction data

| Evaluation life imaging heartbeat AFS: |                |       |               |        | Genotype                          | HandGFP; w1118 | HandGFP; CAP49e |
|----------------------------------------|----------------|-------|---------------|--------|-----------------------------------|----------------|-----------------|
| Apparent Fractional Shortening [%]     |                |       |               |        |                                   |                |                 |
| HandGFP; CAP49e.                       |                |       |               |        | sample size                       | 3,00           | 15,00           |
| Sample No.                             | HandGFP;CAP49e |       | HandGFP;w1118 |        |                                   |                |                 |
|                                        | AFS [%]        |       | Sample No.    | AFS[%] |                                   |                |                 |
|                                        | 2              | 17,12 | 1             | 54,56  | Larva #1                          | 54,56          | 17,12           |
|                                        | 3              | 30,05 | 2             | 52,07  | Larva #2                          | 52,07          | 30,05           |
|                                        | 4              | 2,36  | 3             | 39,19  | Larva #3                          | 39,19          | 2,36            |
|                                        | 5              | 0,31  | AVERAGE       | 48,61  | Larva #4                          |                | 0,31            |
|                                        | 7              | 41,17 | STABW.S       | 8,25   | Larva #5                          |                | 41,17           |
|                                        | 8              | 31,55 | MAX           | 54,56  | Larva #6                          |                | 31,55           |
|                                        | 9              | 9,66  | MIN           | 39,19  | Larva #7                          |                | 9,66            |
|                                        | 12             | 0,58  |               |        | Larva #8                          |                | 0,58            |
|                                        | 13             | 54,35 |               |        | Larva #9                          |                | 54,35           |
|                                        | 15             | 3,00  |               |        | Larva #10                         |                | 3,00            |
|                                        | 16             | 22,09 |               |        | Larva #11                         |                | 22,09           |
|                                        | 17             | 51,41 |               |        | Larva #12                         |                | 51,41           |
|                                        | 18             | 1,60  |               |        | Larva #13                         |                | 1,60            |
|                                        | 20             | 26,00 |               |        | Larva #14                         |                | 26,00           |
|                                        | 21             | 19,50 |               |        | Larva #15                         |                | 19,50           |
| Average                                | 20,72          |       |               |        | Average                           | 48,61          | 20,72           |
| Standard deviation                     | 18,32          |       |               |        | Stand. Deviation                  | 8,25           | 18,32           |
| MAX                                    | 54,35          |       |               |        | Variance                          | 68,06          | 335,77          |
| MIN                                    | 0,31           |       |               |        | t.test (type3) p score (to w1118) | 1              | 0,004366096     |
|                                        |                |       |               |        | significance (to wild type)       | n.s.           | **              |
|                                        |                |       |               |        | p<0.05=*; p<0.01=**               |                |                 |

### 3. Evaluation of heart transport activity by dye angiography

#### 3.1 Transport rate as average pixel intensity in ROI ( $w^{1118}$ )

| sec | w1118-1 | w1118-2 | w1118-3 | Average<br>w1118 1-3 | Stand. Dev.<br>w1118 1-3 |
|-----|---------|---------|---------|----------------------|--------------------------|
| 0   | 10,51   | 4,38    | 25,48   | 13,46                | 8,86                     |
| 20  | 3,26    | 2,25    | 0,42    | 1,98                 | 1,18                     |
| 40  | 13,72   | 15,60   | 0,00    | 9,77                 | 6,95                     |
| 60  | 46,42   | 24,96   | 4,84    | 25,41                | 16,98                    |
| 80  | 44,51   | 53,73   | 10,41   | 36,21                | 18,63                    |
| 100 | 49,40   | 66,57   | 40,89   | 52,29                | 10,68                    |
| 120 | 50,60   | 71,66   | 44,56   | 55,60                | 11,62                    |
| 140 | 47,42   | 77,47   | 49,76   | 58,21                | 13,65                    |
| 160 | 49,65   | 73,85   | 56,54   | 60,01                | 10,18                    |
| 180 | 47,18   | 77,84   | 58,89   | 61,30                | 12,63                    |

#### 3.2 Transport rate as average pixel intensity in ROI ( $CAP^{42b}$ )

| sec | CAP42b-1 | CAP42b-2 | CAP42b-3 | CAP42b-4 | CAP42b-5 | CAP42b-6 | CAP42b-7 | Average<br>CAP42b1-7 | Stand. Dev.<br>CAP42b1-7 |
|-----|----------|----------|----------|----------|----------|----------|----------|----------------------|--------------------------|
| 0   | 0,496    | 8,341    | 6,638    | 6,857    | 0,000    | 7,305    | 11,717   | 5,908                | 4,228                    |
| 20  | 3,960    | 1,047    | 0,000    | 7,993    | 4,766    | 0,000    | 0,400    | 2,595                | 3,066                    |
| 40  | 3,847    | 0,027    | 0,499    | 0,384    | 4,713    | 5,059    | 0,000    | 2,076                | 2,340                    |
| 60  | 4,324    | 0,193    | 1,273    | 0,188    | 7,024    | 33,287   | 0,760    | 6,721                | 11,987                   |
| 80  | 3,793    | 0,361    | 4,565    | 0,134    | 7,002    | 46,024   | 17,431   | 11,330               | 16,370                   |
| 100 | 3,868    | 0,213    | 7,786    | 0,690    | 7,666    | 57,923   | 24,699   | 14,692               | 20,772                   |
| 120 | 2,664    | 0,386    | 15,345   | 0,622    | 23,508   | 69,581   | 25,753   | 19,694               | 24,445                   |
| 140 | 2,660    | 0,195    | 15,530   | 0,612    | 24,390   | 69,394   | 25,596   | 19,768               | 24,423                   |
| 160 | 2,705    | 0,060    | 15,486   | 0,473    | 24,857   | 69,512   | 25,324   | 19,774               | 24,500                   |
| 180 | 2,800    | 0,000    | 15,221   | 0,328    | 25,170   | 69,467   | 25,300   | 19,755               | 24,519                   |

#### 3.3 Transport rate as average pixel intensity in ROI ( $CAP^{49e}$ )

| sec | CAP49e-1 | CAP49e-2 | CAP49e-3 | CAP49e-4 | CAP49e-5 | CAP49e-6 | Average<br>CAP49e 1-6 | Stand. Dev.<br>CAP49e 1-6 |
|-----|----------|----------|----------|----------|----------|----------|-----------------------|---------------------------|
| 0   | 17,48    | 9,36     | 8,46     | 7,07     | 3,40     | 0,82     | 7,76                  | 5,75                      |
| 20  | 14,84    | 0,66     | 8,22     | 1,12     | 0,68     | 0,00     | 4,25                  | 6,02                      |
| 40  | 14,73    | 0,40     | 11,87    | 3,66     | 13,90    | 5,41     | 8,33                  | 5,96                      |
| 60  | 14,58    | 0,10     | 0,00     | 3,80     | 15,87    | 3,47     | 6,30                  | 7,11                      |
| 80  | 0,00     | 0,31     | 2,99     | 6,07     | 15,71    | 13,48    | 6,43                  | 6,73                      |
| 100 | 3,64     | 0,47     | 2,67     | 7,28     | 15,22    | 21,76    | 8,51                  | 8,30                      |
| 120 | 4,76     | 0,72     | 4,11     | 9,44     | 14,55    | 23,07    | 9,44                  | 8,23                      |
| 140 | 5,83     | 0,49     | 3,97     | 9,39     | 14,57    | 39,46    | 12,28                 | 14,16                     |
| 160 | 6,65     | 1,42     | 6,73     | 8,63     | 13,80    | 42,49    | 13,28                 | 14,85                     |
| 180 | 5,35     | 1,37     | 10,53    | 7,89     | 38,81    | 48,94    | 18,81                 | 19,90                     |

#### 3.4 Evaluation of transport rate data

| sec                        | w1118 control | CAP42b     | CAP49e    |
|----------------------------|---------------|------------|-----------|
| 20                         | 1,98          | 2,60       | 4,25      |
| 40                         | 9,77          | 2,08       | 8,33      |
| 60                         | 25,41         | 6,72       | 6,30      |
| 80                         | 36,21         | 11,33      | 6,43      |
| 100                        | 52,29         | 14,69      | 8,51      |
| 120                        | 55,60         | 19,69      | 9,44      |
| 140                        | 58,21         | 19,77      | 12,28     |
| 160                        | 60,01         | 19,77      | 13,28     |
| 180                        | 61,30         | 19,76      | 18,81     |
| t.test (2;3)               | 1             | 0,00717222 | 0,0038543 |
| significance<br>(to w1118) | n.s.          | **         | **        |
